# Supplementary material for: Associations of loneliness and social isolation with cardiovascular and metabolic health: a systematic review and meta-analysis protocol
Source: PubMed Central journal article supplement (PMC7199368; doi:10.1186/s13643-020-01369-8), 2020-05-04
Supplement: 13643_2020_1369_MOESM3_ESM.pdf [file 13643_2020_1369_MOESM3_ESM.pdf]

| Categories                                             | Values |
|--------------------------------------------------------|--------|
| A. Identification of study                             |        |
| 1. Study ID                                            |        |
| 2. Authors                                             |        |
| 3. Title                                               |        |
| 4. Year of Publication                                 |        |
| B. Primary Values                                      |        |
| 1. Number of Correlations                              |        |
| 2. Stroke                                              |        |
| 3. Coronary Heart Disease                              |        |
| 4. Diabetes                                            |        |
| 5. Hypertension                                        |        |
| 6. BMI (Obesity indicator)                             |        |
| 7. Dyslipidaemia                                       |        |
| 8. Metabolic Syndrome                                  |        |
| 9. Inflammation Markers (if applicable)                |        |
| 10. Smoking                                            |        |
| 11. Physical activity                                  |        |
| C. Population                                          |        |
| 1. Gender (%)                                          |        |
| 2. Age range                                           |        |
| 3. Sample size                                         |        |
| 4. Mental Health Status                                |        |
| 5. Somatic Health Status                               |        |
| 6. Ethnicity\Region                                    |        |
| D. Moderators                                          |        |
| 1. Study type                                          |        |
| 2. Scale used (loneliness/Social isolation assessment) |        |
| 3. Criteria used                                       |        |
| 4. Loneliness x social isolation models                |        |
| 5. Adjustment for potential confounders/covariates     |        |
| E. Bias                                                |        |
| 1. Questionnaire                                       |        |
